# Supplementary material for: Interaction rule and mechanism of perfluoroalkyl sulfonates containing different carbon chains with human serum albumin
Source: Royal Society of Chemistry journal article supplement (doi:10.1039/c7ra02963b), 2017-01-01
Supplement: c7ra02963b1.pdf [file c7ra02963b1.pdf]

## Supplementary Information

### Interaction Rule and Mechanism of Perfluoroalkyl Sulfonates contained different carbon chain with Human Serum Albumin

Yang Liu<sup>a</sup>, Zhaozhen Cao<sup>b</sup>, Wansong Zong<sup>c, \*</sup>, Rutao Liu<sup>a, \*</sup>

<sup>a</sup> School of Environmental Science and Engineering, Shandong University, China–  
America CRC for Environment & Health, Shandong Province, 27# Shanda South Road,  
Jinan 250100, P.R. China

<sup>b</sup> School of Chemistry and Chemical Engineering, Shandong University, Jinan, 250100,  
Shandong Province, P.R. China

<sup>c</sup> College of Population, Resources and Environment, Shandong Normal University,  
88# East Wenhua Road, Jinan 250014, PR China.

\*All correspondence should be addressed to:

Rutao Liu

School of Environmental Science and Engineering,  
Shandong University, Jinan 250100 P.R.China

Phone/Fax: 86-531-88364868

Email: [rutaoliu@sdu.edu.cn](mailto:rutaoliu@sdu.edu.cn) (Liu RT)

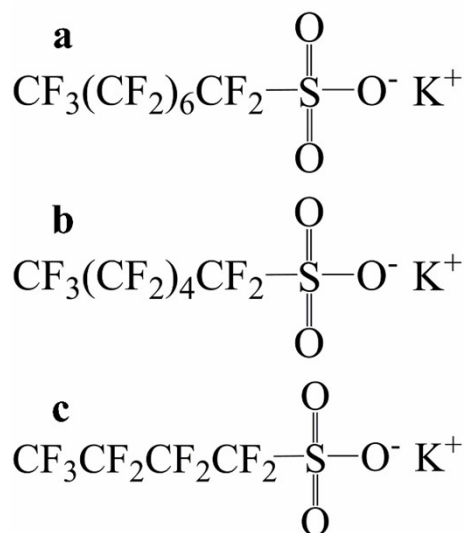

**Fig. S1** Chemical structure of perfluorooctane sulfonate, perfluorohexane sulfonate and perfluorobutane sulfonate: a (potassium salt of PFOS), b (potassium salt of PFHS), c (potassium salt of PFBS).

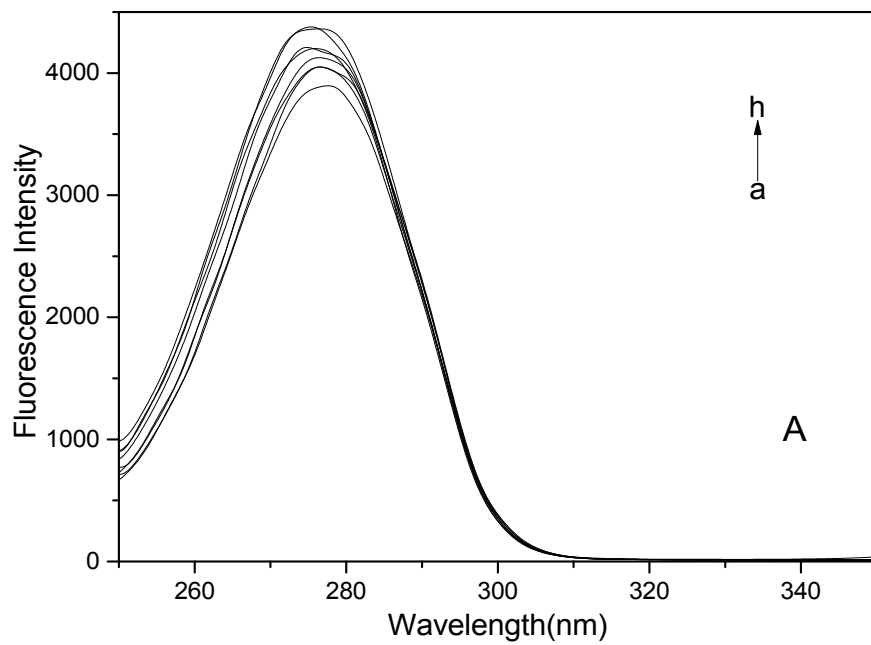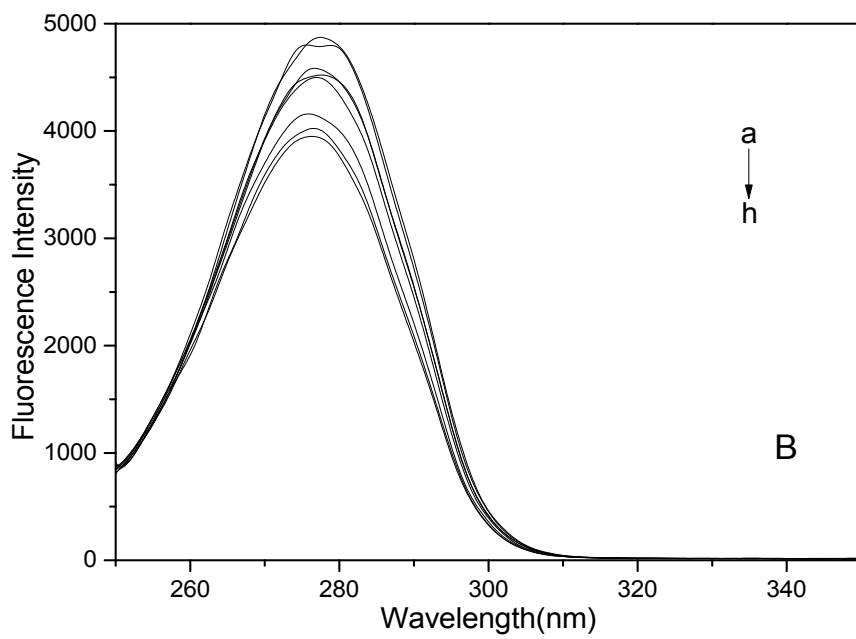

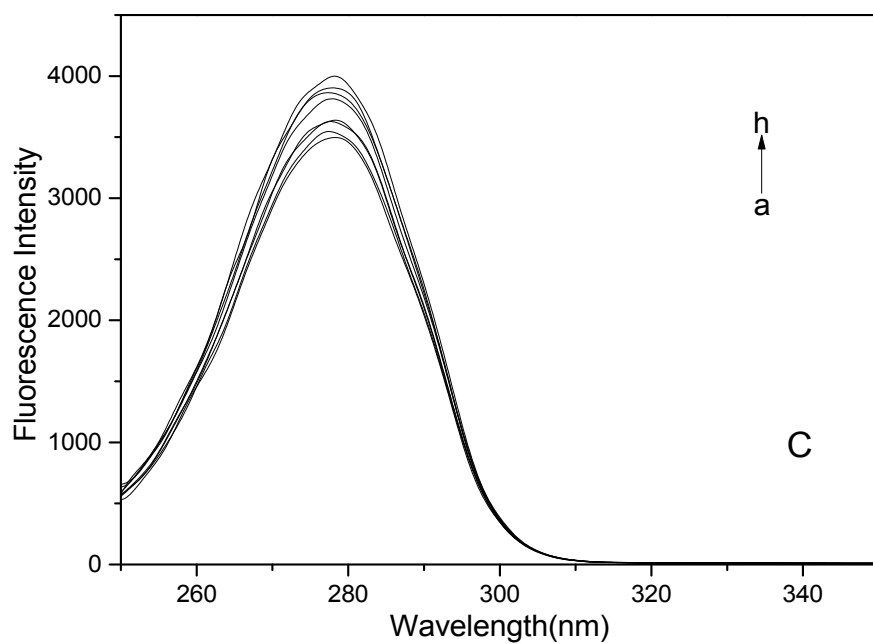

**Fig. S2** Synchronous fluorescence spectra of HSA with different concentrations of PFASs. Conditions: HSA:  $1 \times 10^{-6}$  mol/L; A (PFOS), B (PFHS) and C (PFBS) (a-h):  $0, 2 \times 10^{-6}, 6 \times 10^{-6}, 1 \times 10^{-5}, 3 \times 10^{-5}, 5 \times 10^{-5}, 7 \times 10^{-5}, 1 \times 10^{-4}$  mol/L; pH=7.4; T=298 K;  $\Delta\lambda=60$  nm.

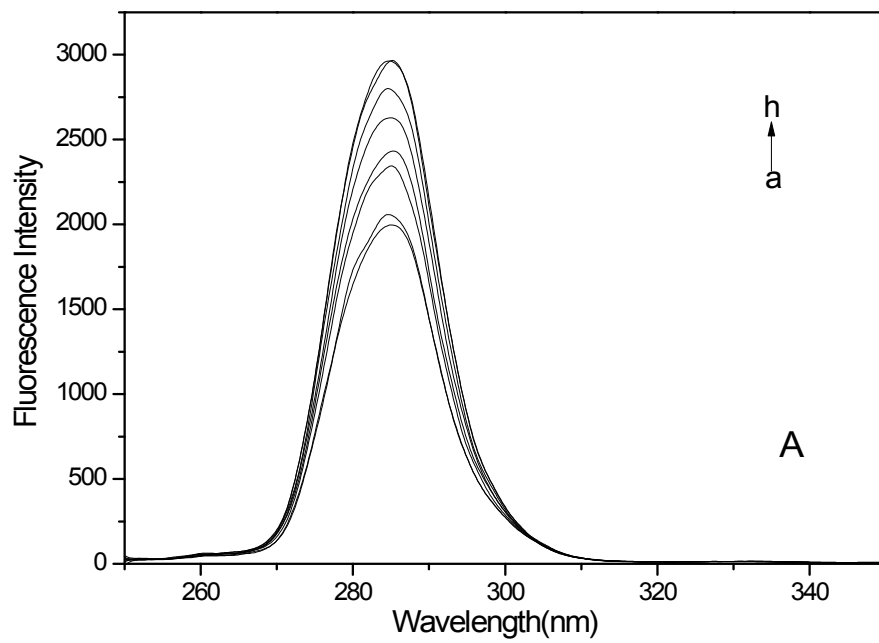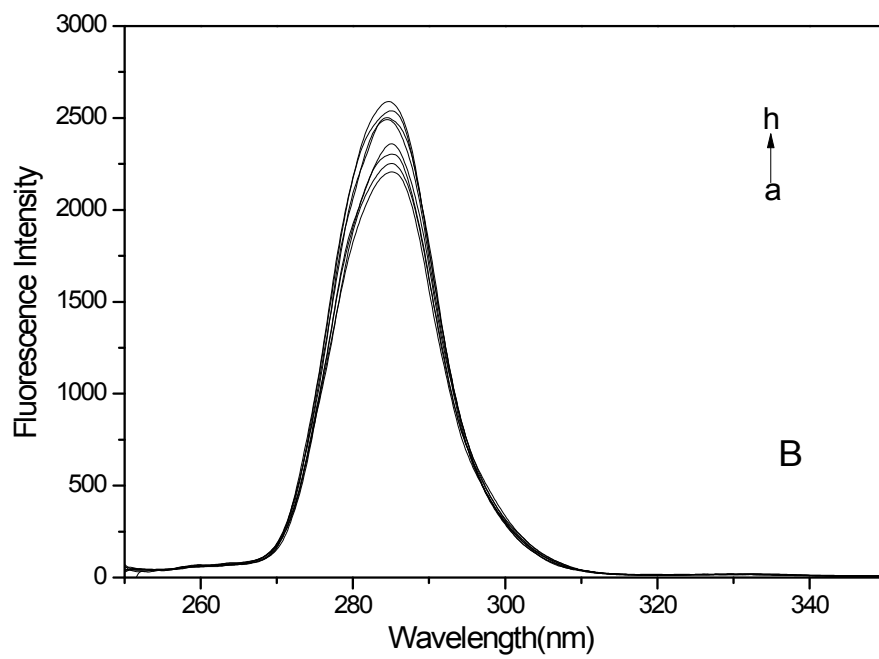

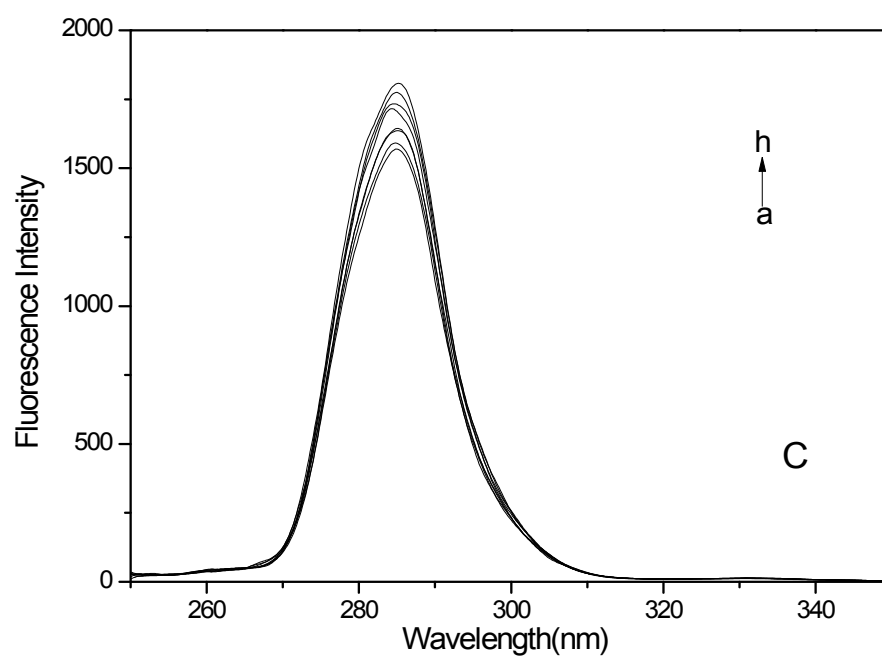

**Fig. S3** Synchronous fluorescence spectra of HSA with different concentrations of PFASs. Conditions: HSA:  $1 \times 10^{-6}$  mol/L; A (PFOS), B (PFHS) and C (PFBS) (a-h): 0,  $2 \times 10^{-6}$ ,  $6 \times 10^{-6}$ ,  $1 \times 10^{-5}$ ,  $3 \times 10^{-5}$ ,  $5 \times 10^{-5}$ ,  $7 \times 10^{-5}$ ,  $1 \times 10^{-4}$  mol/L; pH=7.4; T=298 K;  $\Delta\lambda=15$  nm.

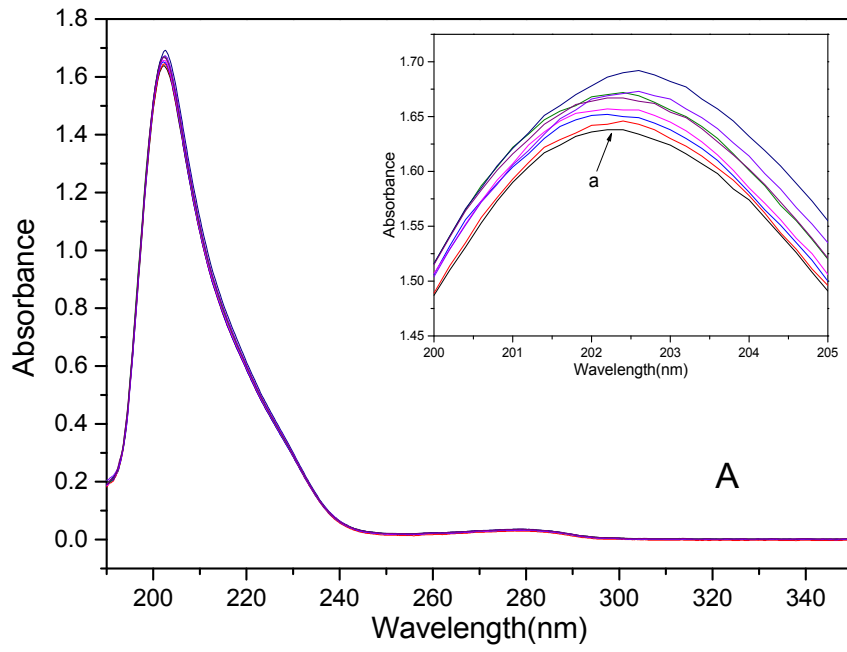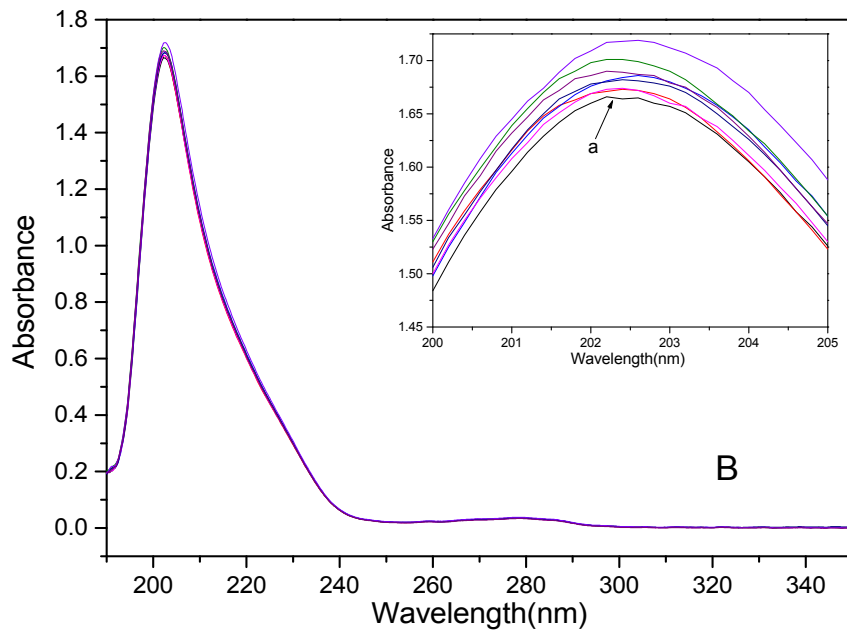

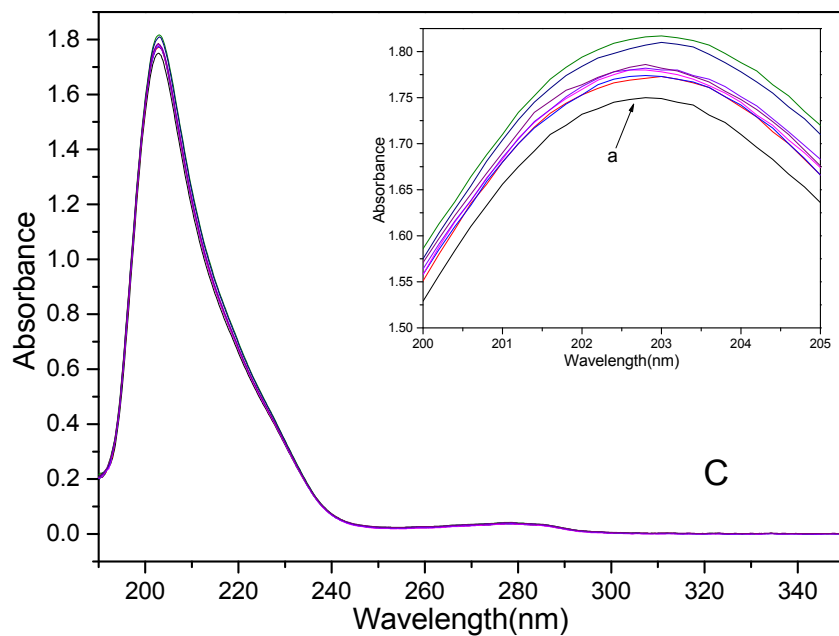

**Fig. S4** UV-visible absorption spectra of HSA with different concentrations of PFASs. Conditions: HSA:  $1 \times 10^{-6}$  mol/L; A (PFOS), B (PFHS) and C (PFBS): 0,  $2 \times 10^{-6}$ ,  $6 \times 10^{-6}$ ,  $1 \times 10^{-5}$ ,  $3 \times 10^{-5}$ ,  $5 \times 10^{-5}$ ,  $7 \times 10^{-5}$ ,  $1 \times 10^{-4}$  mol/L; pH=7.4; T=298 K;



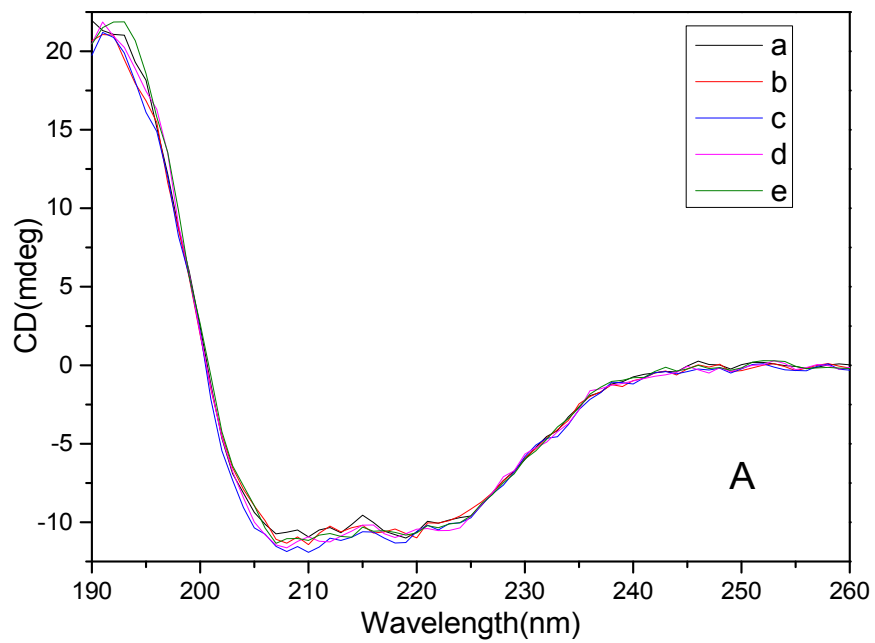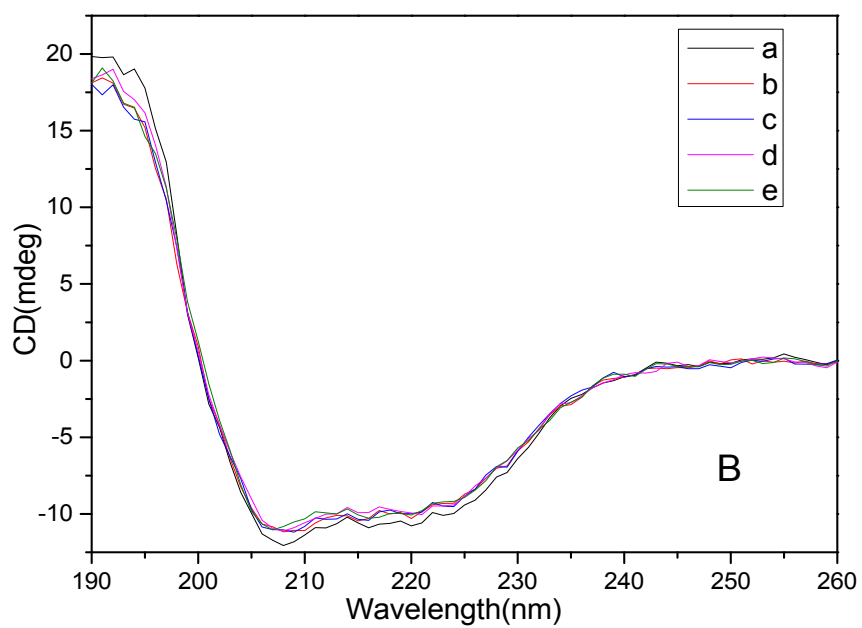

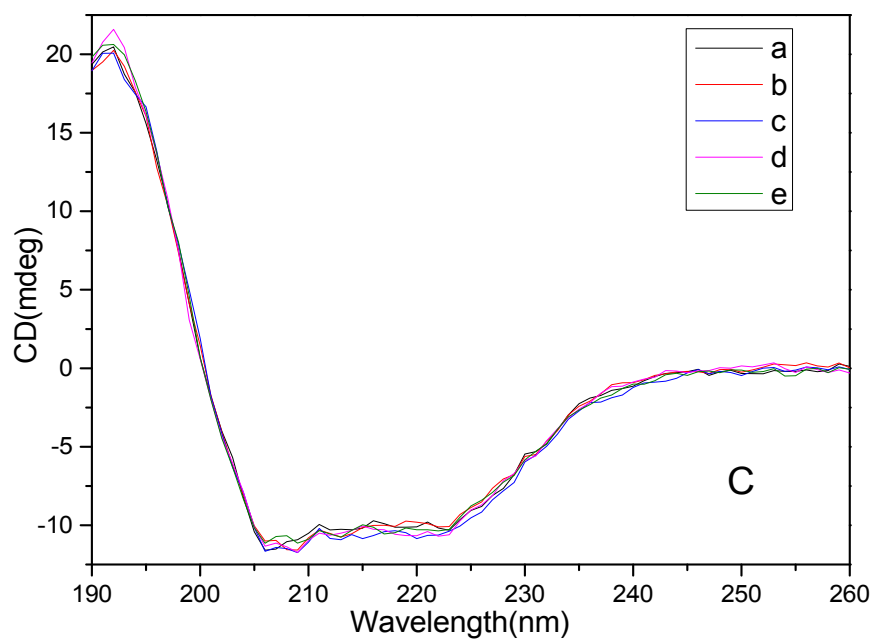

**Fig. S5** CD Spectra of HSA with different concentrations of PFASs. Conditions: HSA:  $1 \times 10^{-6}$  mol/L; A (PFOS), B (PFHS) and C (PFBS) (a-e) : 0,  $5 \times 10^{-6}$ ,  $1 \times 10^{-5}$ ,  $5 \times 10^{-5}$ ,  $1 \times 10^{-4}$  mol/L; pH=7.4; T=298K.

**Table S1** The interaction data between PFOS and HSA

| Ligand | Receptor | Residue | Type  | Distance |
|--------|----------|---------|-------|----------|
| H 8881 | OD 5973  | Asn 391 | H-don | 1.39     |
| O 8880 | NH 6284  | Arg 410 | H-acc | 2.65     |
| O 8878 | OH 6306  | Tyr 411 | H-acc | 2.48     |

**Table S2** The interaction data between PFHS and HSA

| Ligand | Receptor | Residue | Type  | Distance |
|--------|----------|---------|-------|----------|
| H 8880 | OD 5973  | Asn 391 | H-don | 1.28     |
| O 8879 | NH 6284  | Arg 410 | H-acc | 2.50     |
| O 8877 | OH 6306  | Tyr 411 | H-acc | 2.53     |

**Table S3** The interaction data between PFBS and HSA

| Ligand | Receptor | Residue | Type  | Distance |
|--------|----------|---------|-------|----------|
| H 8887 | OD 5973  | Asn 391 | H-don | 1.32     |
| O 8886 | NH 6284  | Arg 410 | H-acc | 2.60     |
| O 8877 | OH 6306  | Tyr 411 | H-acc | 2.49     |
